# Supplementary material for: Molecular Identification of Anisakis Larvae Extracted by Gastrointestinal Endoscopy from Health Check-up Patients in Korea
Source: PubMed Central journal article supplement — Korean J Parasitol. 2019 Apr 30;57(2):207–11. doi: 10.3347/kjp.2019.57.2.207 (PMC6526215; doi:10.3347/kjp.2019.57.2.207), 2019-04-30
Supplement: kjp-57-2-207-suppl.pdf [file kjp-57-2-207-suppl.pdf]

**Supplementary Table S1.** Nucleotide identity (%) of *Anisakis* spp. larvae from the sea eel with *Anisakis pegreffii*, *A. simplex* s.s., and *A. typica* by gene sequencing

| Sample no. | ITS region                        |                                 |                                | COX2                              |                                 |                                |
|------------|-----------------------------------|---------------------------------|--------------------------------|-----------------------------------|---------------------------------|--------------------------------|
|            | <i>A. pegreffii</i><br>(AB277823) | <i>A. simplex</i><br>(AB277822) | <i>A. typica</i><br>(AY826724) | <i>A. pegreffii</i><br>(EU413958) | <i>A. simplex</i><br>(AB517560) | <i>A. typica</i><br>(AB517571) |
| A 2        | 100                               | 99.7                            | 74.2                           | 100.0                             | 94.7                            | 86.5                           |
| A 3        | 100                               | 99.7                            | 74.2                           | 98.2                              | 95.5                            | 86.5                           |
| A 4        | 100                               | 99.7                            | 74.2                           | 99.6                              | 94.7                            | 86.9                           |
| A 5        | 100                               | 99.7                            | 74.2                           | 98.2                              | 95.5                            | 86.5                           |
| A 6        | 100                               | 99.7                            | 74.2                           | 98.2                              | 95.5                            | 86.5                           |
| A 7        | 100                               | 99.7                            | 74.2                           | 99.0                              | 94.2                            | 85.9                           |
| A 8        | 100                               | 99.7                            | 74.2                           | 97.5                              | 95.1                            | 86.5                           |
| A 9        | 100                               | 99.7                            | 74.2                           | 99.2                              | 94.5                            | 86.2                           |
| A 10       | 100                               | 99.7                            | 74.2                           | 99.4                              | 94.5                            | 86.5                           |
| A 11       | 100                               | 99.7                            | 74.2                           | 100.0                             | 94.7                            | 86.5                           |
| A 12       | 100                               | 99.7                            | 74.2                           | 99.6                              | 94.3                            | 86.4                           |
| A 13       | 100                               | 99.7                            | 74.2                           | 99.4                              | 94.9                            | 86.4                           |
| A 14       | 100                               | 99.7                            | 74.2                           | -                                 | -                               | -                              |
| A 15       | 100                               | 99.7                            | 74.2                           | 96.9                              | 94.7                            | 85.8                           |
| A 16       | 100                               | 99.7                            | 74.2                           | 100.0                             | 94.7                            | 86.5                           |
| A 17       | 100                               | 99.7                            | 74.2                           | 99.6                              | 94.7                            | 86.5                           |
| A 18       | 100                               | 99.7                            | 74.2                           | 100.0                             | 94.7                            | 86.5                           |
| A 19       | 100                               | 99.7                            | 74.2                           | 100.0                             | 94.7                            | 86.5                           |
| A 20       | 100                               | 99.7                            | 74.2                           | 100.0                             | 94.7                            | 86.5                           |
| A 22       | 100                               | 99.7                            | 74.2                           | 100.0                             | 94.7                            | 86.5                           |
| A 23       | 100                               | 99.7                            | 74.2                           | 99.8                              | 94.5                            | 86.4                           |
| A 24       | 100                               | 99.7                            | 74.2                           | 100.0                             | 94.7                            | 86.5                           |
| A 26       | 100                               | 99.7                            | 74.2                           | 100.0                             | 94.7                            | 86.5                           |
| A 27       | 100                               | 99.7                            | 74.2                           | 100.0                             | 94.7                            | 86.5                           |
| A 28       | 100                               | 99.7                            | 74.2                           | 100.0                             | 94.7                            | 86.5                           |
| A 29       | 100                               | 99.7                            | 74.2                           | 100.0                             | 94.7                            | 86.5                           |
| A 30       | 100                               | 99.7                            | 74.2                           | 98.0                              | 95.3                            | 86.7                           |
| A 31       | 100                               | 99.7                            | 74.2                           | 99.2                              | 94.4                            | 85.9                           |
| A 32       | 100                               | 99.7                            | 74.2                           | 99.8                              | 94.5                            | 86.7                           |
| A 33       | 100                               | 99.7                            | 74.2                           | 99.8                              | 94.5                            | 86.4                           |
| A 35       | 100                               | 99.7                            | 74.2                           | 98.2                              | 95.5                            | 86.5                           |
| A 36       | 100                               | 99.7                            | 74.2                           | 98.2                              | 95.5                            | 86.5                           |
| A 37       | 100                               | 99.7                            | 74.2                           | 99.8                              | 94.5                            | 86.4                           |
| A 38       | 100                               | 99.7                            | 74.2                           | 98.2                              | 95.5                            | 86.5                           |
| A 39       | 100                               | 99.7                            | 74.2                           | 99.8                              | 94.5                            | 86.7                           |
| A 40       | 100                               | 99.7                            | 74.2                           | 98.2                              | 95.5                            | 86.5                           |
| A 41       | 100                               | 99.7                            | 74.2                           | 98.2                              | 95.5                            | 86.5                           |
| A 42       | 100                               | 99.7                            | 74.2                           | 99.6                              | 94.7                            | 86.2                           |
| A 43       | 100                               | 99.7                            | 74.2                           | 97.8                              | 95.5                            | 86.7                           |
| A 44       | 100                               | 99.7                            | 74.2                           | 98.2                              | 95.5                            | 86.5                           |
| A 45       | 100                               | 99.7                            | 74.2                           | 98.2                              | 95.5                            | 86.5                           |
| A 46       | 100                               | 99.7                            | 74.2                           | 100.0                             | 94.7                            | 86.5                           |
| A 47       | 100                               | 99.7                            | 74.2                           | 99.8                              | 94.9                            | 86.4                           |
| A 48       | 100                               | 99.7                            | 74.2                           | 100.0                             | 94.7                            | 86.5                           |
| A 49       | 100                               | 99.7                            | 74.2                           | 98.2                              | 95.5                            | 86.5                           |
| A 51       | 100                               | 99.7                            | 74.2                           | 99.4                              | 95.3                            | 86.2                           |
| A 52       | 100                               | 99.7                            | 74.2                           | 100.0                             | 94.7                            | 86.5                           |
| A 53       | 100                               | 99.7                            | 74.2                           | 98.0                              | 95.3                            | 86.4                           |
| A 54       | 100                               | 99.7                            | 74.2                           | 100.0                             | 94.7                            | 86.5                           |

Sample nos. A1, A21, A25, A34, A50 turned out to be *Hysterothylacium aduncum* by PCR-RFLP and sequencing analyses (data not shown).  
-, data not available.
